# Supplementary material
Source: PubMed Central journal article supplement (PMC3856830)
Supplement: 1316792110_pnas.201316792SI.pdf [file 1316792110_pnas.201316792SI.pdf]

# Supporting Information

Wang et al. 10.1073/pnas.1316792110

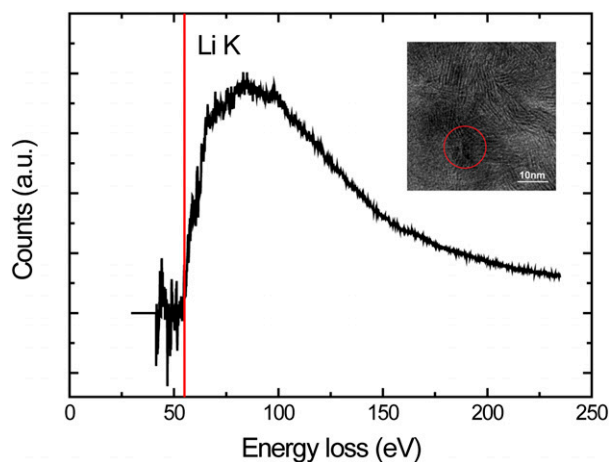

**Fig. S1.** Background-subtracted Li K-edge electron energy loss spectroscopy (EELS) spectrum from 1.1-V lithiation-treated MoS<sub>2</sub> nanofilm on MPGC after ethanol cleaning. (Inset) Red circle is the position where the EELS spectrum was obtained.

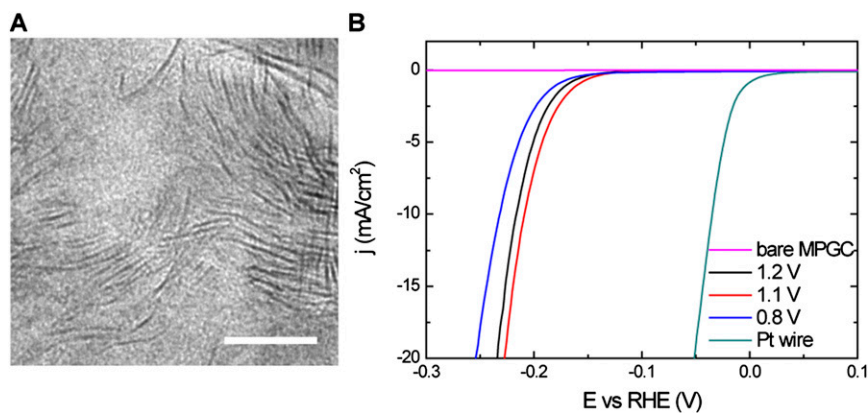

**Fig. S2.** Characterization of 0.8-V lithiated MoS<sub>2</sub>. (A) Deep Li discharge process and the Li reaction with ethanol or water exfoliate MoS<sub>2</sub> which could destroy the bonds between the active material and the substrate. Scale bar, 10 nm. (B) Polarization curves of bare MPGC electrode, Pt wire, and MoS<sub>2</sub> on MPGC lithiated to 1.2, 1.1, and 0.8 V vs. Li<sup>+</sup>/Li. The 0.8-V MoS<sub>2</sub> shows degraded HER activity.

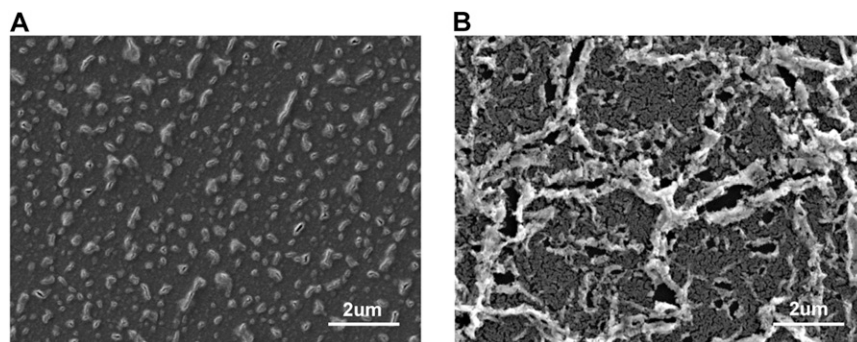

**Fig. S3.** SEM images of pristine and 1.1-V lithiation-treated MoS<sub>2</sub>. (A) SEM image of pristine MoS<sub>2</sub> with pinholes formed during the sulfurization process due to the roughness of the substrate. (B) SEM image of 1.1-V lithiation-treated MoS<sub>2</sub> shows that the original pinholes were opened up during the lithiation and Li-ethanol reaction process. The nanofilm around the pinholes was easier to be peeled off but still maintain the electric contact with the substrate. Scale bar, 2 μm.

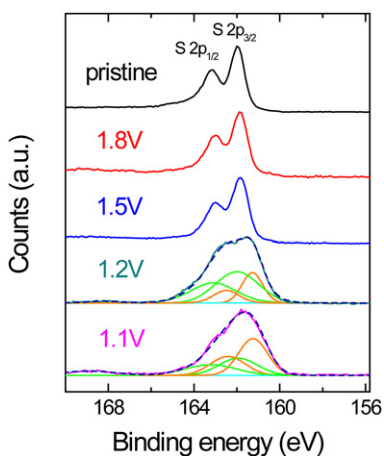

**Fig. S4.** XPS spectra of pristine and Li electrochemically intercalated MoS<sub>2</sub>. S 2p<sub>1/2</sub> and 2p<sub>3/2</sub> peaks of pristine MoS<sub>2</sub> are located at 163.1 and 162.0 eV, respectively. The peaks have no obvious shift when MoS<sub>2</sub> is discharged to 1.8 and 1.5 V vs. Li<sup>+</sup>/Li. Additional peaks emerge when 2H (green line) to 1T (orange line) MoS<sub>2</sub> phase transition happens. The 1T S 2p<sub>1/2</sub> and 2p<sub>3/2</sub> peaks are shifted toward 0.8 eV lower binding energies.

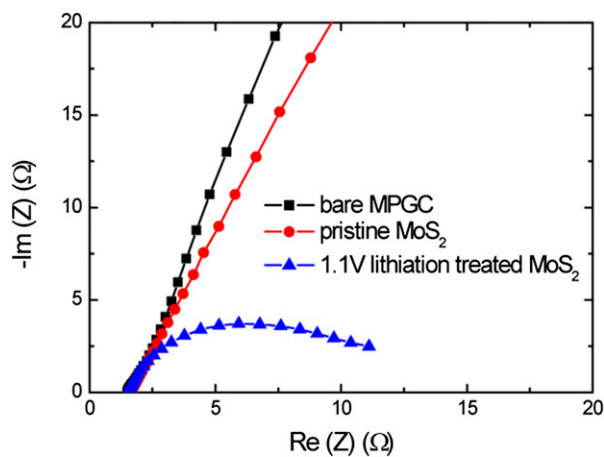

**Fig. S5.** Nyquist plots of impedance spectroscopy analysis of the electrochemical cells setup, where 1-cm<sup>2</sup> bare MPGC and pristine and 1.1-V lithiation-treated MoS<sub>2</sub> nanofilms on it were used as working electrodes. The measurement was performed at -0.2 V vs. RHE. The series resistances are 1.51 Ω for MPGC electrode, 1.68 Ω for MoS<sub>2</sub> electrode, and 1.53 Ω for 1.1-V lithiation-treated MoS<sub>2</sub>. The series resistance primarily comes from wiring and the electrolyte, whereas the resistance of MoS<sub>2</sub> nanofilm is negligible.

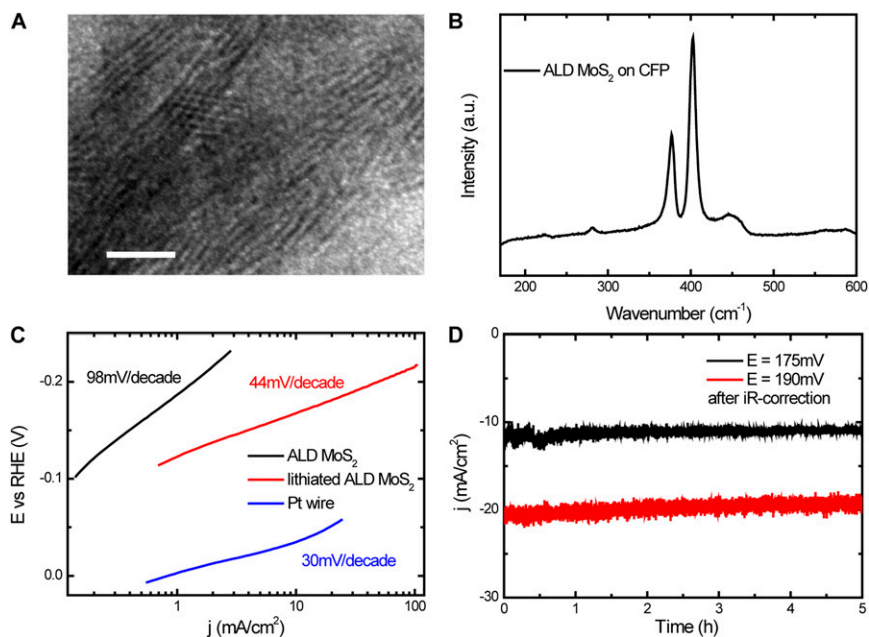

**Fig. S6.** Characterizations of ALD MoS<sub>2</sub> and lithiated ALD MoS<sub>2</sub>. (A) TEM image of ALD MoS<sub>2</sub> synthesized on SiO<sub>2</sub>-Si substrate for sample preparation. The surface is covered by the edges, showing the same structure with MoS<sub>2</sub> converted from Mo illustrated in Fig. 2. Scale bar, 5 nm. (B) Raman spectrum of ALD MoS<sub>2</sub> on CFP. (C) Tafel plots of pristine and lithiated ALD MoS<sub>2</sub> on CFP and Pt wire, with Tafel slopes of 98, 44, and 30 mV per decade, respectively. (D) Stable cathodic currents around 10 and 20 mA/cm<sup>2</sup> were observed for at least 5 h when constant voltages at 175 and 190 mV vs. RHE (iR-corrected) were applied on 0.7-V lithiation-treated ALD MoS<sub>2</sub> catalyst on CFP.

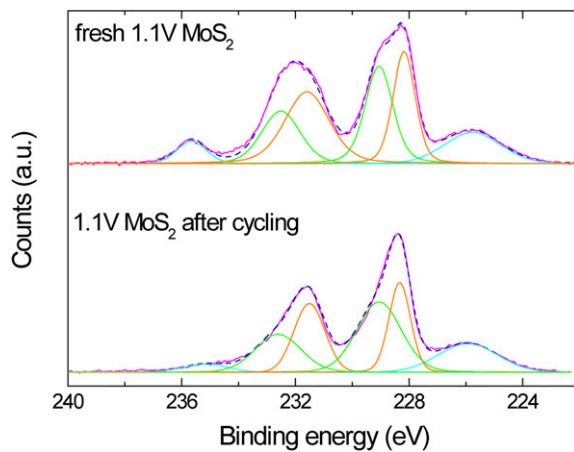

**Fig. S7.** XPS spectra of 1.1-V lithiated MoS<sub>2</sub> before and after electrochemical cycling in acid environment. The ratios of 2H to 1T MoS<sub>2</sub> before and after cycling are 0.86 and 0.78, showing no obvious change. The 1T phase MoS<sub>2</sub> is stable during the hydrogen evolution process.

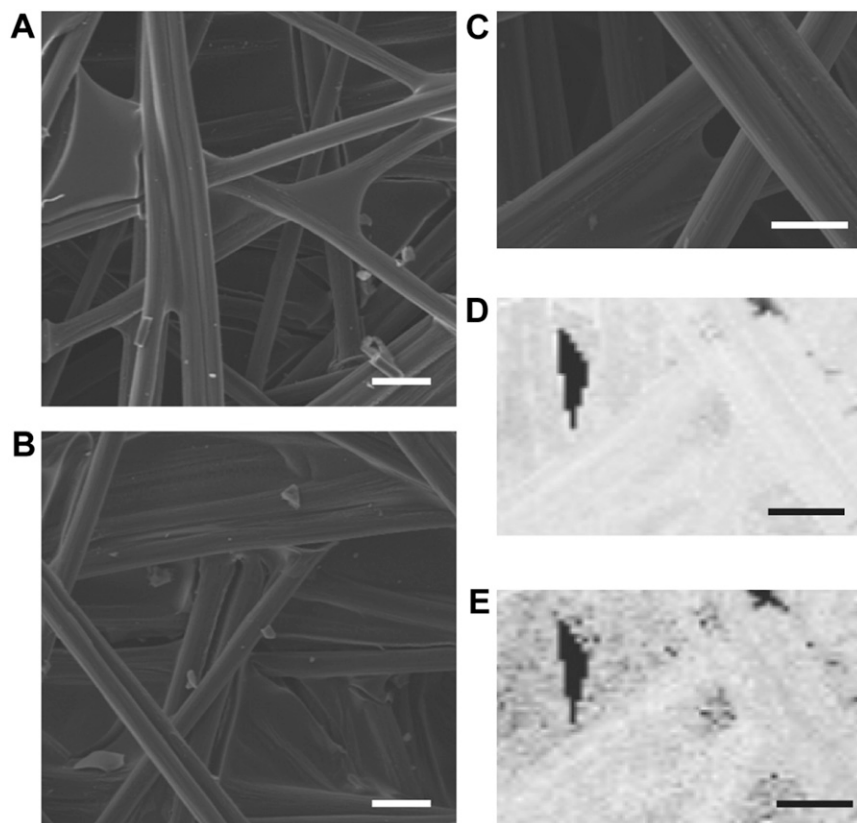

**Fig. S8.** Auger element mapping of ALD MoO<sub>3</sub> on CFP. (A) SEM image of CFP. (B and C) SEM images of ALD MoO<sub>3</sub> on CFP. (D and E) Auger electron microscopy element mapping at the same area in (C) for O and Mo, respectively. (A and B) Scale bar, 20 μm. (C–E) Scale bar, 10 μm.

**Table S1. Inductively coupled plasma mass spectroscopy results of lithiation-treated MoS<sub>2</sub> on CFP after different processes**

| Materials                                                   | Li:Mo atomic ratio, % |
|-------------------------------------------------------------|-----------------------|
| 1. MoS <sub>2</sub> on CFP after lithiation process         | 287.0                 |
| 2. Lithiated MoS <sub>2</sub> on CFP after ethanol cleaning | 16.5                  |
| 3. Lithiation-treated MoS <sub>2</sub> after 1,000 cycles   | 8.6                   |

MoS<sub>2</sub> was synthesized on carbon fiber paper and lithiated to 0.7 V vs. Li<sup>+</sup>/Li. Sample 1 was prepared after the catalyst was discharged to 0.7 V and washed in diethyl carbonate in the glovebox to remove the electrolyte. Sample 2 was made after the lithiated MoS<sub>2</sub> was washed by ethanol. Sample 3 was taken after 1,000 CV cycles in H<sub>2</sub>SO<sub>4</sub>.
